# Supplementary material
Source: PubMed Central journal article supplement (PMC2750848)
Supplement: NIHMS91422-supplement-1_si_001.pdf [file NIHMS91422-supplement-1_si_001.pdf]

## SUPPORTING INFORMATION

### Inhibition of Siderophore Biosynthesis by 2-Triazole Substituted Analogues of 5'-O-[N-(Salicyl)sulfamoyl]adenosine: Antibacterial Nucleosides Effective Against *Mycobacterium tuberculosis*

*Amol Gupte, Helena I. Boshoff,<sup>b</sup> Daniel J. Wilson,<sup>a</sup> João Neres,<sup>a</sup> Nicholas P. Labello, <sup>a</sup>  
Ravindranadh V. Somu,<sup>a</sup> Chengguo Xing,<sup>c</sup> Clifton E. Barry III,<sup>b</sup> Courtney C. Aldrich<sup>a\*</sup>*

<sup>a</sup>Center for Drug Design, Academic Health Center, University of Minnesota, Minneapolis, Minnesota 55455

<sup>b</sup>Tuberculosis Research Section, National Institute of Allergy and Infectious Diseases, Bethesda, Maryland 20892

<sup>c</sup>Department of Medicinal Chemistry, University of Minnesota, Minneapolis, Minnesota, MN 55455

---

**Table S1.** HPLC purity and conditions for the final compounds.

| <b>Compound</b> | <b>Conditions</b> | <b>Retention time (min)</b> | <b>Purity (%)</b> |
|-----------------|-------------------|-----------------------------|-------------------|
| <b>16</b>       | Method 2          | 7.3                         | 95.4              |
|                 | Method 4          | 7.4                         | 95.6              |
| <b>17</b>       | Method 2          | 8.5                         | 97.1              |
|                 | Method 4          | 9.0                         | 95.6              |
| <b>18</b>       | Method 1          | 12.8                        | 95.0              |
|                 | Method 3          | 13.0                        | 95.5              |
| <b>19</b>       | Method 1          | 13.5                        | 97.9              |
|                 | Method 3          | 13.9                        | 99.2              |
| <b>20</b>       | Method 1          | 13.9                        | 97.8              |
|                 | Method 3          | 14.5                        | 98.3              |
| <b>21</b>       | Method 1          | 14.2                        | 95.3              |
|                 | Method 3          | 14.9                        | 96.9              |
| <b>22</b>       | Method 1          | 14.5                        | 99.9              |
|                 | Method 3          | 15.2                        | 98.4              |
| <b>23</b>       | Method 1          | 14.8                        | 99.8              |
|                 | Method 3          | 15.4                        | 97.8              |
| <b>24</b>       | Method 1          | 15.2                        | 99.9              |
|                 | Method 3          | 16.0                        | 97.4              |
| <b>25</b>       | Method 2          | 20.7                        | 98.5              |
|                 | Method 4          | 22.3                        | 98.3              |
| <b>26</b>       | Method 2          | 10.7                        | 97.0              |
|                 | Method 4          | 10.8                        | 96.7              |
| <b>27</b>       | Method 2          | 13.3                        | 99.3              |
|                 | Method 4          | 13.8                        | 98.0              |
| <b>28</b>       | Method 2          | 8.1                         | 99.3              |
|                 | Method 4          | 8.1                         | 99.4              |
| <b>29</b>       | Method 2          | 11.7                        | 96.9              |
|                 | Method 4          | 12.0                        | 97.7              |
| <b>30</b>       | Method 2          | 13.6                        | 99.2              |
|                 | Method 4          | 14.2                        | 98.5              |
| <b>31</b>       | Method 2          | 14.0                        | 96.7              |
|                 | Method 4          | 14.6                        | 97.0              |
| <b>32</b>       | Method 2          | 13.9                        | 95.2              |
|                 | Method 4          | 14.6                        | 95.1              |
| <b>33</b>       | Method 3          | 14.0                        | 95.4              |
|                 | Method 4          | 11.3                        | 95.1              |
| <b>34</b>       | Method 2          | 10.4                        | 98.6              |
|                 | Method 4          | 11.0                        | 96.9              |
| <b>35</b>       | Method 2          | 9.2                         | 96.9              |
|                 | Method 4          | 9.6                         | 95.9              |

| Compound | Conditions | Retention time (min) | Purity (%) |
|----------|------------|----------------------|------------|
| 36       | Method 2   | 8.9                  | 96.3       |
|          | Method 4   | 9.0                  | 97.4       |
| 37       | Method 2   | 11.7                 | 95.7       |
|          | Method 4   | 12.8                 | 95.1       |
| 38       | Method 2   | 12.0                 | 98.1       |
|          | Method 4   | 12.9                 | 96.5       |
| 39       | Method 2   | 11.7                 | 95.8       |
|          | Method 4   | 12.8                 | 95.4       |
| 40       | Method 2   | 11.0                 | 98.3       |
|          | Method 4   | 12.7                 | 96.2       |
| 41       | Method 2   | 12.2                 | 98.8       |
|          | Method 4   | 9.9                  | 99.0       |
| 42       | Method 2   | 8.9                  | 95.0       |
|          | Method 4   | 9.6                  | 95.3       |
| 43       | Method 2   | 8.9                  | 96.5       |
|          | Method 4   | 9.1                  | 95.5       |
| 44       | Method 2   | 10.6                 | 95.8       |
|          | Method 4   | 7.7                  | 97.0       |
| 45       | Method 2   | 8.1                  | 95.7       |
|          | Method 4   | 8.7                  | 95.0       |

- HPLC solvents:

A1: 20 mM Triethylammonium bicarbonate

A2: 50 mM Triethylammonium bicarbonate

B1: Methanol

B2: Acetonitrile

- HPLC column:

Analytical: Varian Microsorb MV100-5 C18, 250 × 4.6 mm, operated at 1 mL/min, detection at 220 nm.

- Methods:

Method 1: Elution with A1 and 20-80% linear gradient of B1 in 20 min followed by isocratic elution with 80% B for 6 min.

Method 2: Elution with A2 and 20-80% linear gradient of B2 in 20 min followed by isocratic elution with 80% B for 6 min.

Method 3: Elution with A1 and 20-100% linear gradient of B1 in 30 min.

Method 4: Elution with A2 and 20-100% linear gradient of B2 in 30 min.
